# Supplementary material
Source: publisher figshare collection journal article supplement (https://f1000.figshare.com/ndownloader/files/1261334)
Supplement: Supplementary file 1 [file 1261334]

Prism Group	LVF-between-leftshift	LVF-between-rightshift	LVF-within-leftshift	LVF-within-rightshift	RVF-between-leftshift	RVF-between-rightshift	RVF-within-leftshift	RVF-within-rightshift
L	79.17	87.5	91.67	91.67	87.5	79.17	95.83	87.5
L	70.83	45.83	75	70.83	83.33	87.5	91.67	70.83
L	91.67	100	91.67	100	91.67	79.17	95.83	87.5
L	87.5	95.83	75	83.33	91.67	83.33	95.83	95.83
L	45.83	95.83	54.17	91.67	87.5	58.33	70.83	75
L	62.5	83.33	75	70.83	83.33	54.17	91.67	91.67
L	75	58.33	83.33	91.67	54.17	50	58.33	50
L	58.33	100	70.83	95.83	87.5	41.67	100	75
L	70.83	79.17	62.5	83.33	95.83	75	91.67	66.67
L	83.33	50	83.33	87.5	91.67	45.83	83.33	79.17
L	54.17	91.67	75	91.67	66.67	70.83	87.5	79.17
L	66.67	66.67	66.67	75	79.17	62.5	79.17	62.5
L	83.33	66.67	70.83	79.17	83.33	70.83	83.33	75
L	79.17	83.33	87.5	83.33	91.67	83.33	87.5	83.33
L	62.5	95.83	66.67	87.5	91.67	62.5	91.67	79.17
L	70.83	70.83	62.5	91.67	91.67	50	91.67	79.17
L	87.5	95.83	91.67	70.83	91.67	87.5	91.67	66.67
L	54.17	50	54.17	54.17	79.17	58.33	87.5	70.83
L	54.17	83.33	50	62.5	79.17	54.17	83.33	45.83
N	66.67	83.33	75	75	75	66.67	70.83	83.33
N	75	83.33	79.17	87.5	83.33	66.67	95.83	75
N	70.83	95.83	87.5	91.67	83.33	83.33	95.83	91.67
N	75	54.17	70.83	62.5	62.5	83.33	79.17	79.17
N	54.17	66.67	87.5	83.33	45.83	54.17	91.67	79.17
N	66.67	75	62.5	91.67	75	62.5	83.33	83.33
N	54.17	62.5	58.33	50	75	58.33	70.83	79.17
N	91.67	95.83	83.33	91.67	91.67	83.33	95.83	100
N	79.17	70.83	79.17	87.5	91.67	70.83	83.33	75
N	66.67	83.33	83.33	83.33	91.67	54.17	100	54.17
N	70.83	91.67	75	87.5	95.83	54.17	95.83	79.17
N	91.67	83.33	87.5	83.33	83.33	87.5	75	66.67
N	83.33	95.83	58.33	83.33	100	70.83	91.67	66.67
N	45.83	66.67	79.17	79.17	87.5	66.67	87.5	66.67
N	58.33	91.67	66.67	87.5	75	58.33	95.83	45.83
N	45.83	87.5	50	87.5	87.5	50	100	58.33
N	54.17	87.5	54.17	79.17	75	50	75	50
N	83.33	83.33	87.5	95.83	91.67	95.83	87.5	75
N	87.5	91.67	83.33	91.67	95.83	91.67	91.67	79.17
N	70.83	75	54.17	70.83	70.83	66.67	66.67	75
R	75	100	95.83	100	95.83	83.33	100	87.5
R	87.5	91.67	79.17	95.83	95.83	62.5	75	95.83
R	66.67	75	70.83	91.67	91.67	79.17	83.33	70.83
R	66.67	79.17	83.33	91.67	83.33	58.33	83.33	79.17
R	50	58.33	54.17	70.83	58.33	58.33	62.5	58.33
R	91.67	83.33	83.33	95.83	83.33	87.5	83.33	95.83
R	75	87.5	70.83	91.67	83.33	87.5	91.67	91.67
R	79.17	87.5	70.83	95.83	100	95.83	95.83	83.33
R	66.67	45.83	70.83	50	87.5	91.67	91.67	66.67
R	66.67	50	58.33	75	62.5	87.5	79.17	91.67
R	54.17	91.67	79.17	100	100	45.83	75	45.83
R	79.17	100	83.33	87.5	91.67	83.33	91.67	87.5
R	70.83	70.83	45.83	79.17	75	50	79.17	66.67
R	70.83	87.5	70.83	87.5	100	83.33	100	79.17
R	58.33	87.5	45.83	79.17	83.33	58.33	75	79.17
R	75	66.67	50	37.5	54.17	54.17	58.33	58.33
R	62.5	79.17	45.83	66.67	70.83	45.83	62.5	66.67
R	79.17	95.83	91.67	100	87.5	91.67	95.83	95.83
